# Supplementary material for: Identification of Common Neural Circuit Disruptions in Cognitive Control Across Psychiatric Disorders
Source: Atypon-hosted journal article supplement (doi:10.1176/appi.ajp.2017.16040400), 2017-03-21
Supplement: appi.ajp.2017.16040400.ds001.pdf [file appi.ajp.2017.16040400.ds001.pdf]

 


Psychiatry Online
